# Supplementary material
Source: PubMed Central journal article supplement (PMC3065697)
Supplement: supp_btr070_bioinf-2010-0823-File001.pdf [file supp_btr070_bioinf-2010-0823-File001.pdf]

# Supplementary Material

## Network clustering: probing biological heterogeneity by sparse graphical models

Sach Mukherjee<sup>1,2</sup> and Steven M. Hill<sup>2,1</sup>

<sup>1</sup>Centre for Complexity Science and <sup>2</sup>Department of Statistics, University of Warwick, Coventry CV4 7AL, U.K.

|    |        |    |       |    |        |     |          |     |         |
|----|--------|----|-------|----|--------|-----|----------|-----|---------|
| 1  | ACVR2A | 31 | CTTN  | 61 | EP300  | 91  | MCC      | 121 | STAT1   |
| 2  | ADNP   | 32 | ENAH  | 62 | EP300  | 92  | MCM7     | 122 | STAT1   |
| 3  | PARP1  | 33 | EP300 | 63 | EP300  | 93  | MCM7     | 123 | STAT1   |
| 4  | AKAP5  | 34 | EP300 | 64 | ERBB2  | 94  | CD46     | 124 | STAT3   |
| 5  | AKAP8  | 35 | EP300 | 65 | ESR1   | 95  | MGMT     | 125 | STAT3   |
| 6  | ANXA1  | 36 | EP300 | 66 | FADD   | 96  | MGMT     | 126 | TRADD   |
| 7  | ANXA2  | 37 | EP300 | 67 | FADD   | 97  | MLH1     | 127 | TUBB2A  |
| 8  | AP2M1  | 38 | EP300 | 68 | FADD   | 98  | MSH2     | 128 | TYR     |
| 9  | ATXN2  | 39 | EP300 | 69 | FN1    | 99  | MSH6     | 129 | VASP    |
| 10 | BCAR1  | 40 | EP300 | 70 | XRCC6  | 100 | MSN      | 130 | VIL1    |
| 11 | CASP2  | 41 | EP300 | 71 | GRB2   | 101 | MSN      | 131 | EZR     |
| 12 | CASP2  | 42 | EP300 | 72 | GSK3B  | 102 | NME1     | 132 | YWHAG   |
| 13 | CASP7  | 43 | EP300 | 73 | GSTP1  | 103 | PGR      | 133 | STAT3   |
| 14 | CASP7  | 44 | EP300 | 74 | GSTP1  | 104 | PRKCA    | 134 | STAT5A  |
| 15 | CASP7  | 45 | EP300 | 75 | GTF2B  | 105 | PRKCB    | 135 | STAT5A  |
| 16 | CASP7  | 46 | EP300 | 76 | HRAS   | 106 | PRKCI    | 136 | STAT6   |
| 17 | CCNA2  | 47 | EP300 | 77 | HSPA4  | 107 | PTPN11   | 137 | STAT6   |
| 18 | CCNB1  | 48 | EP300 | 78 | HSPD1  | 108 | PTPN6    | 138 | TGFB111 |
| 19 | CDC2   | 49 | EP300 | 79 | IRS1   | 109 | RB1      | 139 | FASLG   |
| 20 | CDH1   | 50 | EP300 | 80 | IRF9   | 110 | RB1      | 140 | TP53    |
| 21 | CDH1   | 51 | EP300 | 81 | IRF9   | 111 | RELA     | 141 | TP53    |
| 22 | CDH1   | 52 | EP300 | 82 | JAK1   | 112 | RELA     | 142 | TP53    |
| 23 | CDH2   | 53 | EP300 | 83 | KLK3   | 113 | RELA     | 143 | TP53    |
| 24 | CDH3   | 54 | EP300 | 84 | KRT20  | 114 | RELA     | 144 | TP53    |
| 25 | CDK4   | 55 | EP300 | 85 | KRT7   | 115 | RELA     | 145 | TP53    |
| 26 | CDK5   | 56 | EP300 | 86 | KRT8   | 116 | RELA     | 146 | TP53    |
| 27 | CDK6   | 57 | EP300 | 87 | MAP2K1 | 117 | RIPK1    | 147 | TP53    |
| 28 | CDK7   | 58 | EP300 | 88 | MAP2K2 | 118 | RNASEH2A |     |         |
| 29 | CDKN2A | 59 | EP300 | 89 | MAP2K2 | 119 | EXOC4    |     |         |
| 30 | DSG1   | 60 | EP300 | 90 | MAPK1  | 120 | SMARCB1  |     |         |

Table S1: Proteins from the National Cancer Institute's NCI-60 panel (Shankavaram *et al.*, 2007) used in our cancer proteomic data clustering analysis.

## References

Shankavaram, U. T. *et al.* (2007). Transcript and protein expression profiles of the NCI-60 cancer cell panel: an integrative microarray study. **6**, 820–832.

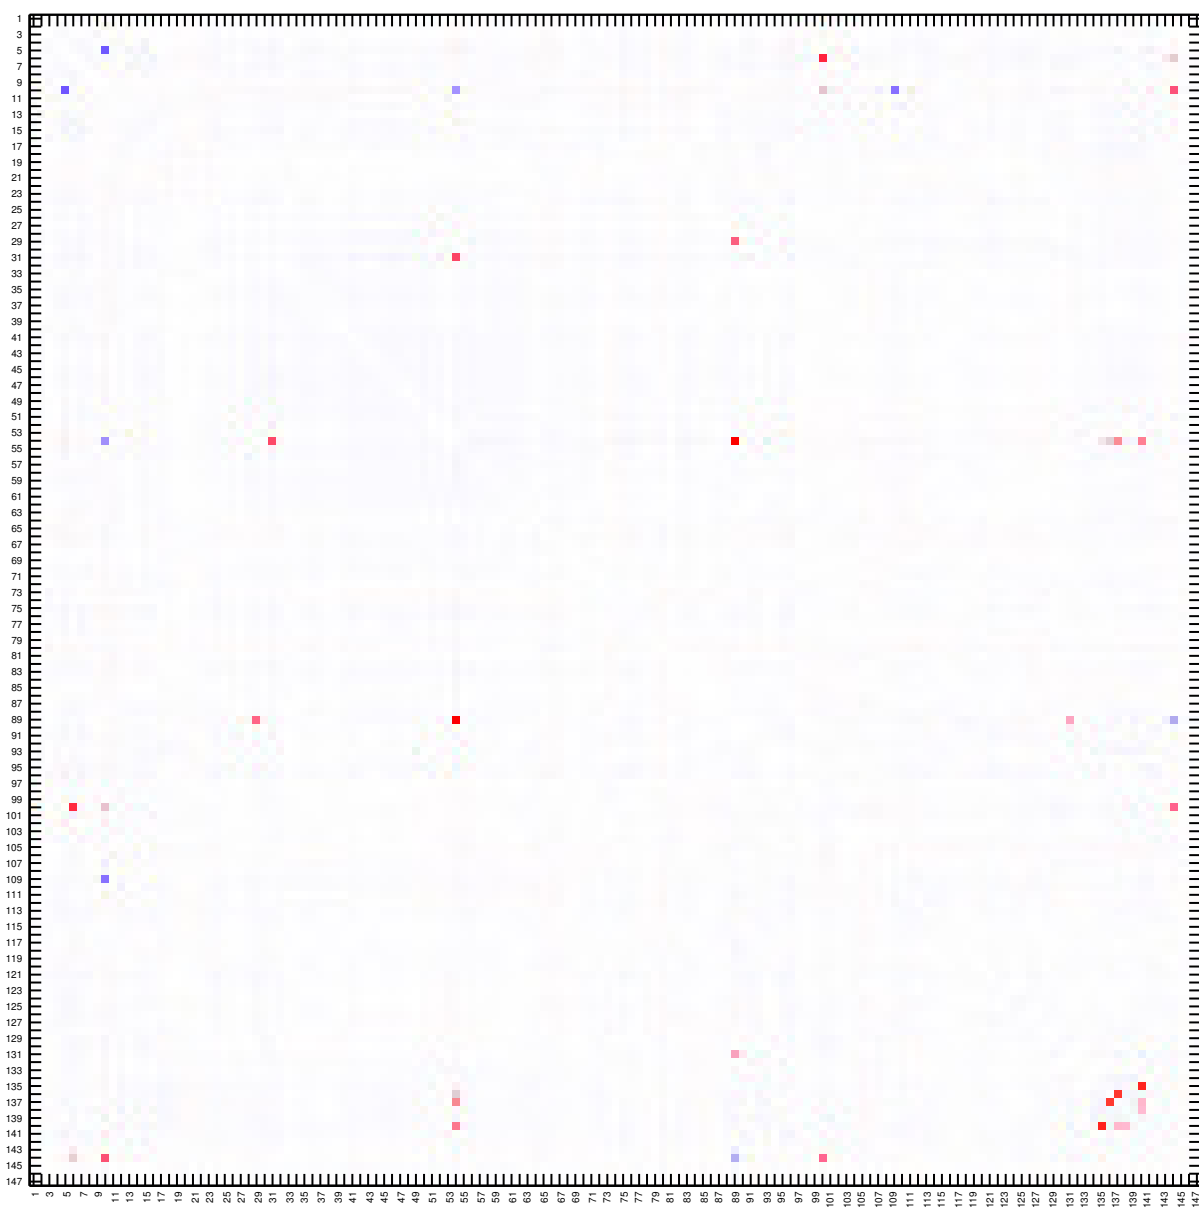

(a) Melanoma cell lines

Figure S1: Network reconstruction results for proteomic data from cancer cell lines. Proteomic data from melanoma and renal cell lines within the NCI60 panel were analyzed by Network Clustering as described in Main Text. Results shown for the highest model score from 100 iterations (this corresponded to the correct clustering into melanoma/renal). We show estimated inverse covariances for (a) Melanoma cell lines and (b) Renal cell lines (red and blue indicate negative and positive values respectively; protein indices as shown in Table S1).

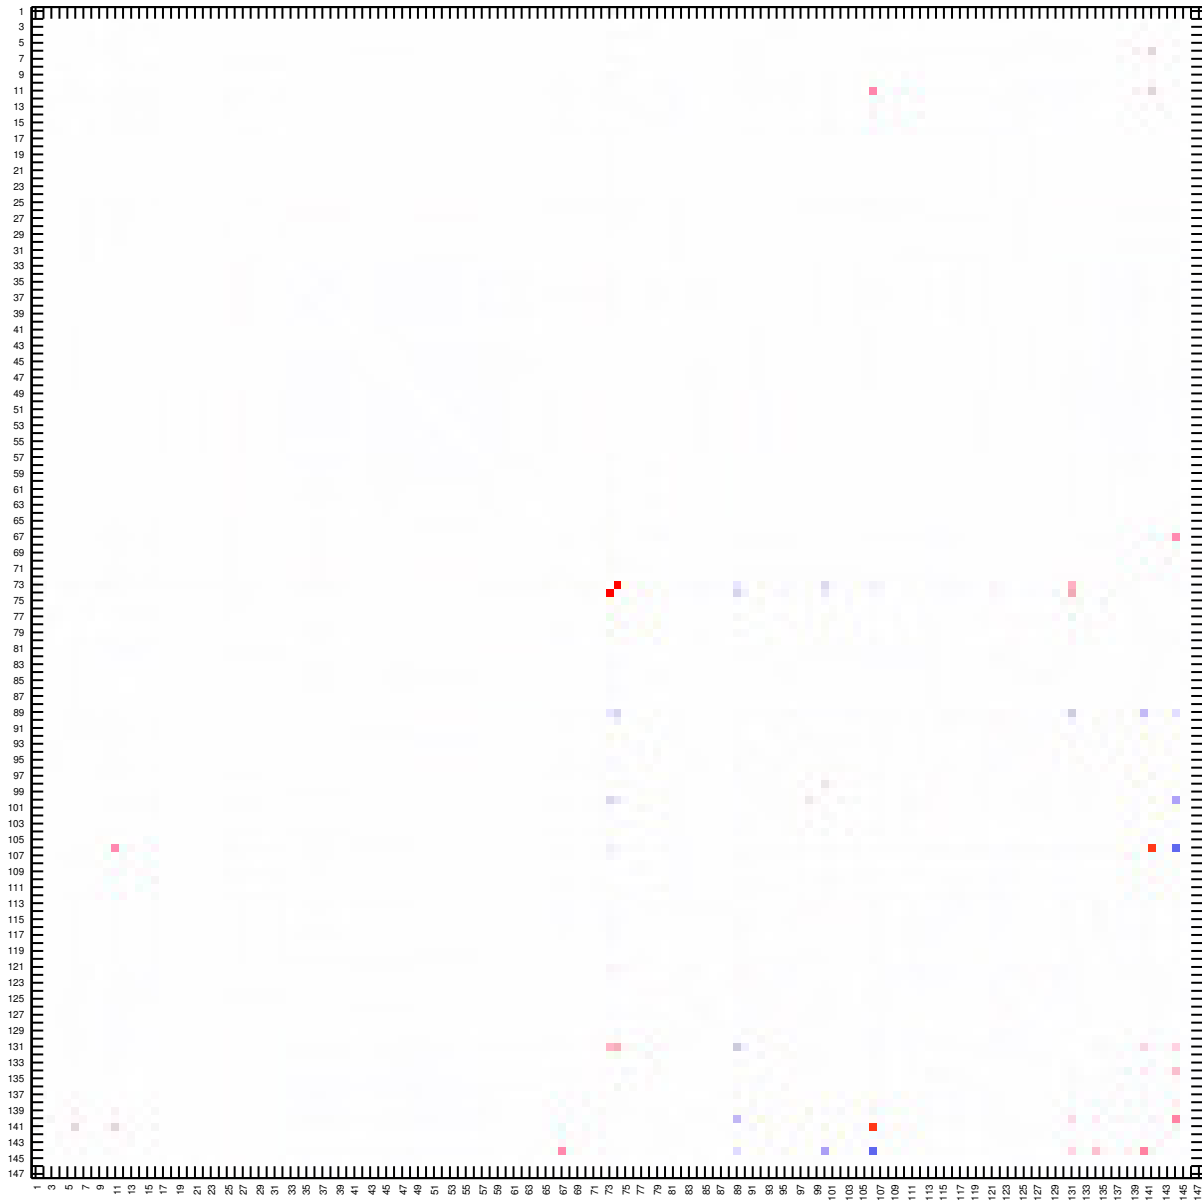

(b) Renal cell lines

Figure S1

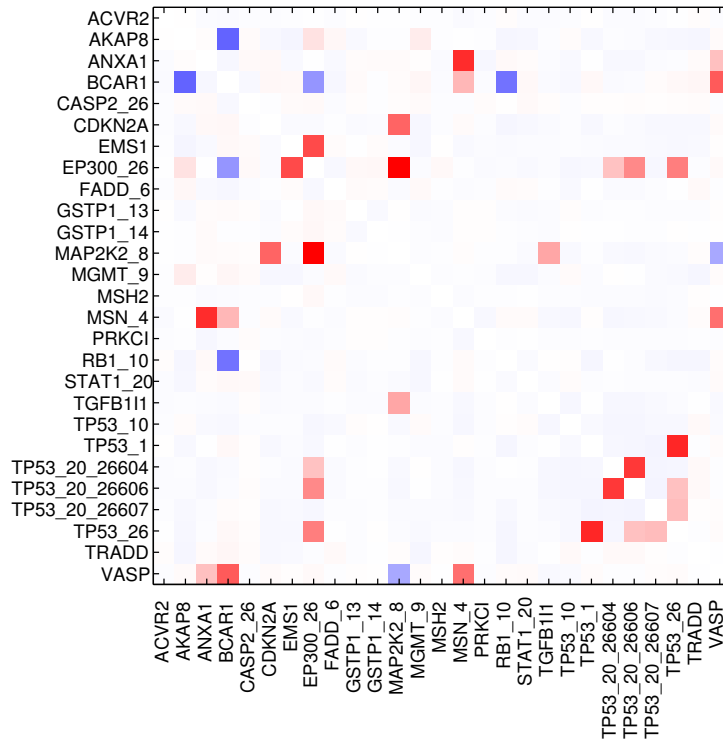

(a) Melanoma cell lines

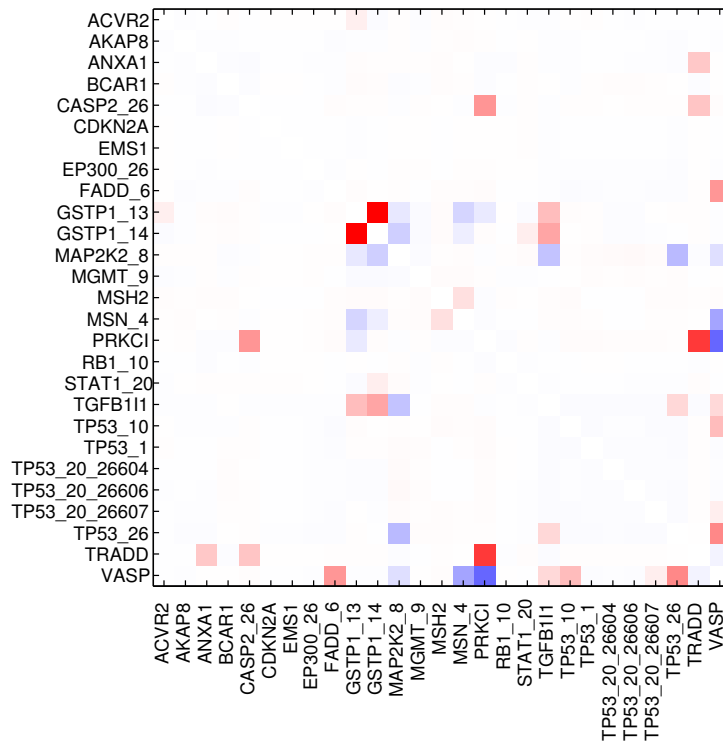

(b) Renal cell lines

Figure S2: Network reconstruction results for proteomic data from cancer cell lines. Inverse covariances as in Figure S1 above, for a subset of proteins only. A protein is included if either or both of the two inverse covariance matrices contain an entry for that protein which is greater than one standard deviation away from the mean of all entries.
